# Supplementary material for: Puerarin Relieved Compression-Induced Apoptosis and Mitochondrial Dysfunction in Human Nucleus Pulposus Mesenchymal Stem Cells via the PI3K/Akt Pathway
Source: Hindawi journal article supplement (doi:10.1155/2020/7126914), 2020-01-11

**Supplementary Table 1. Characteristics details of the patients enrolled in the study.**

| Case no. | Age (years) | Sex | Diagnosis              | Disc level | Pfirrmann grading |
|----------|-------------|-----|------------------------|------------|-------------------|
| 1        | 68          | M   | Lumbar disc herniation | L4/5       | V                 |
| 2        | 59          | M   | Lumbar disc herniation | L5/S1      | V                 |
| 3        | 69          | F   | Lumbar disc herniation | L4/5       | V                 |
| 4        | 60          | F   | Lumbar disc herniation | L4/5       | IV                |
| 5        | 50          | M   | Lumbar disc herniation | L4/5       | IV                |

Abbreviation: M, male; F, female.

**Supplementary Table 2. Rat disc degeneration histological grading scale**

| Scores | AF                                                                                  | NP                                                                                                                                              |
|--------|-------------------------------------------------------------------------------------|-------------------------------------------------------------------------------------------------------------------------------------------------|
| 0      | Well-organized fibrous lamellae without ruptured or serpentine fibers               | Normal cellularity with large vacuoles and stellar-shaped nucleus consistently dispersed in the nucleus                                         |
| 1      | Ruptured or serpentine fibers in less than 30% of the annulus                       | Slight decrease in the number of cells (<50%) with/without cell clustering                                                                      |
| 2      | Ruptured or serpentine fibers in more than 30% of the annulus with reversed contour | Moderate to severe decrease in the number of cells (>50%) with mostly no vacuolization and occupied by proliferative CNT (<50% of nucleus area) |
| 3      | Indistinct and disorganized annulus                                                 | Severe replacement by proliferative CNT (>50% of nucleus area) with small area of vacuole cells                                                 |

AP, annulus fibrosus; NP, nucleus pulposus; CNT, connective tissue.

Scores range from a normal disc (0 point) to severely degenerated disc (6 points).

**Supplementary Figure 1. Evaluation of NPMSCs stemness and cell markers. (A)**

The ability of NPMSCs to differentiate into osteogenic, chondrogenic and adipogenic lineages assessed by Alizarin red staining (Scale bar = 100  $\mu$ m), Alcian blue staining (Scale bar = 100  $\mu$ m), and oil red O staining (Scale bar = 20  $\mu$ m), respectively. (B) Flow cytometric analysis identified the cell surface markers (CD73, CD90, CD105, CD31 and CD45).

**A**

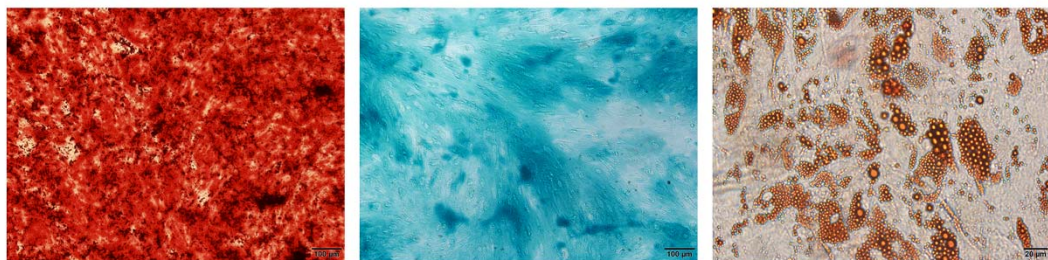

**B**

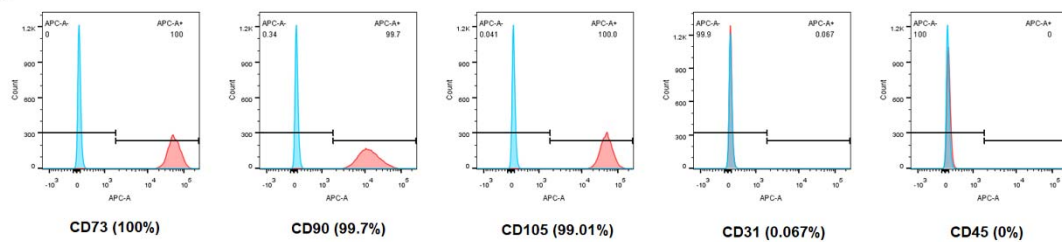

**Supplementary Figure 2.** Schematic diagram of in vivo experiment performed on rat models. A. at the beginning, PUR or saline was injected into the intervertebral discs (Co7/8 and Co8/9). B. pressure was loaded on the rat tails at day 1. C. after pressure for 28 days, rats were sacrificed and their tails was collected for further investigation.

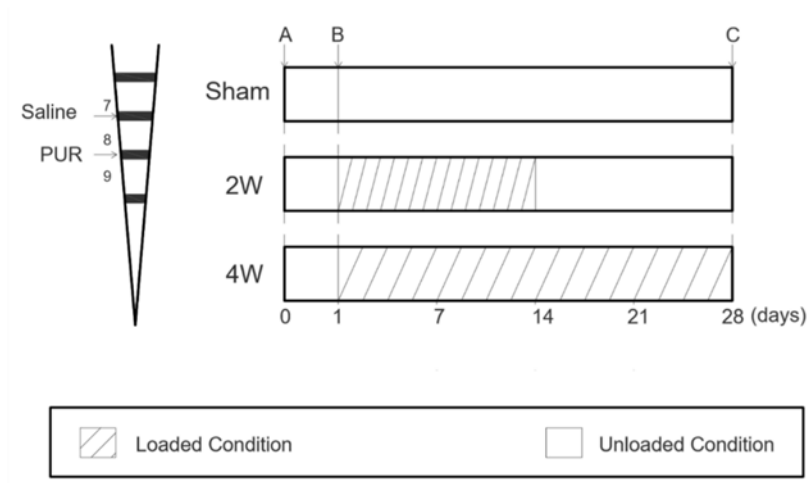

**Supplementary Figure 3.** Quantitative analysis of Edu fluorescence staining. Data were presented as the means  $\pm$  SD ( $n = 3$ ). (\*\* $P < 0.01$ , \*\*\* $P < 0.001$ , and \*\*\*\* $P < 0.0001$  compared with 0h).

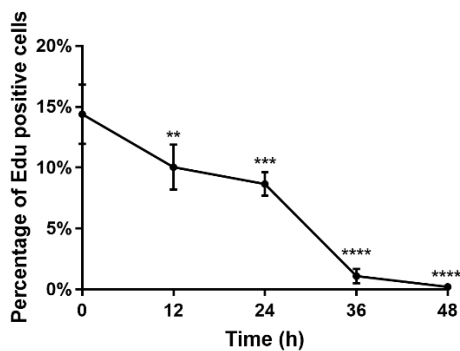

**Supplementary Figure 4.** The cytotoxicity of PUR and LY294002 on NPMSCs in usage concentration was detected by LDH release assay after 72h treatment without compression. Data are presented as mean  $\pm$  SD ( $n=3$ ). \*: Indicates a significant difference ( $*P < 0.05$ ,  $**P < 0.01$ ) between two groups.

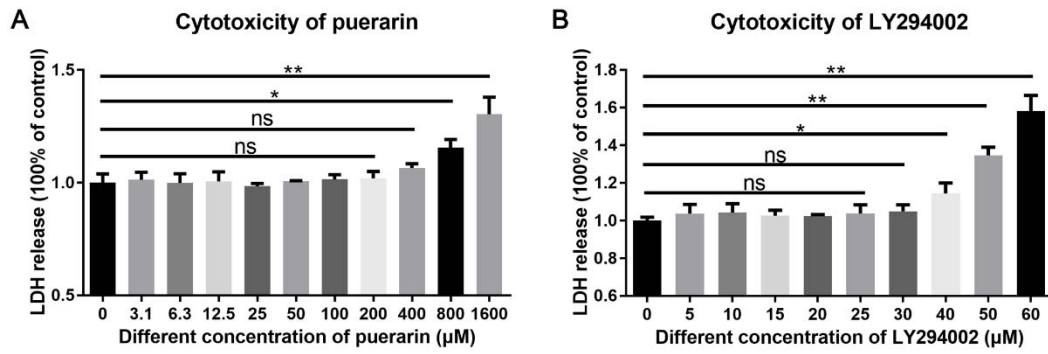

**Supplementary Figure 5.** Dose-dependent protective effects of PUR at various points of 1.0 MPa compression duration. The cell viability was detected by Cell Counting Kit (CCK-8) assay. Data were presented as the means  $\pm$  SD ( $n = 3$ ).

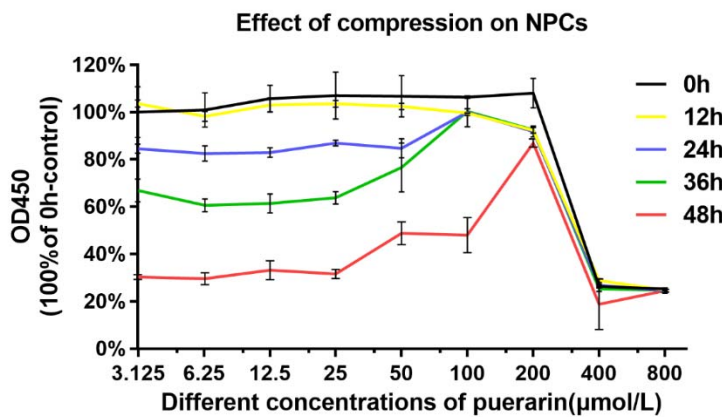

**Supplementary Figure 6.** Quantitative analysis of JC-1 fluorescence staining. Data were presented as the means  $\pm$  SD ( $n = 3$ ). (ns, no significance,  $**P < 0.01$ ,  $***P < 0.001$  between two groups).

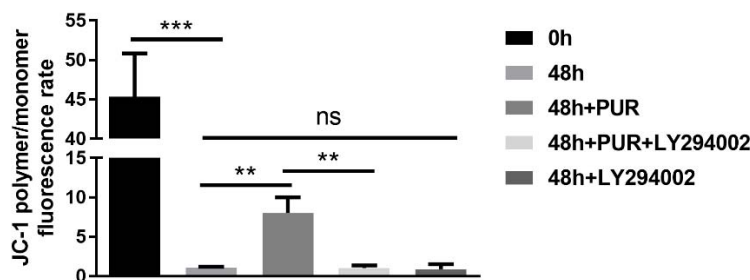

**Supplementary Figure 7.** Reactive hematoxylin and eosin (H&E) and Safranin O-fast green (S-O) staining of rat discs from different groups was observed (scale bar = 500  $\mu$ m). Co 7/8 and Co 8/9 illustrated similar destructive performance under 4 weeks compression.

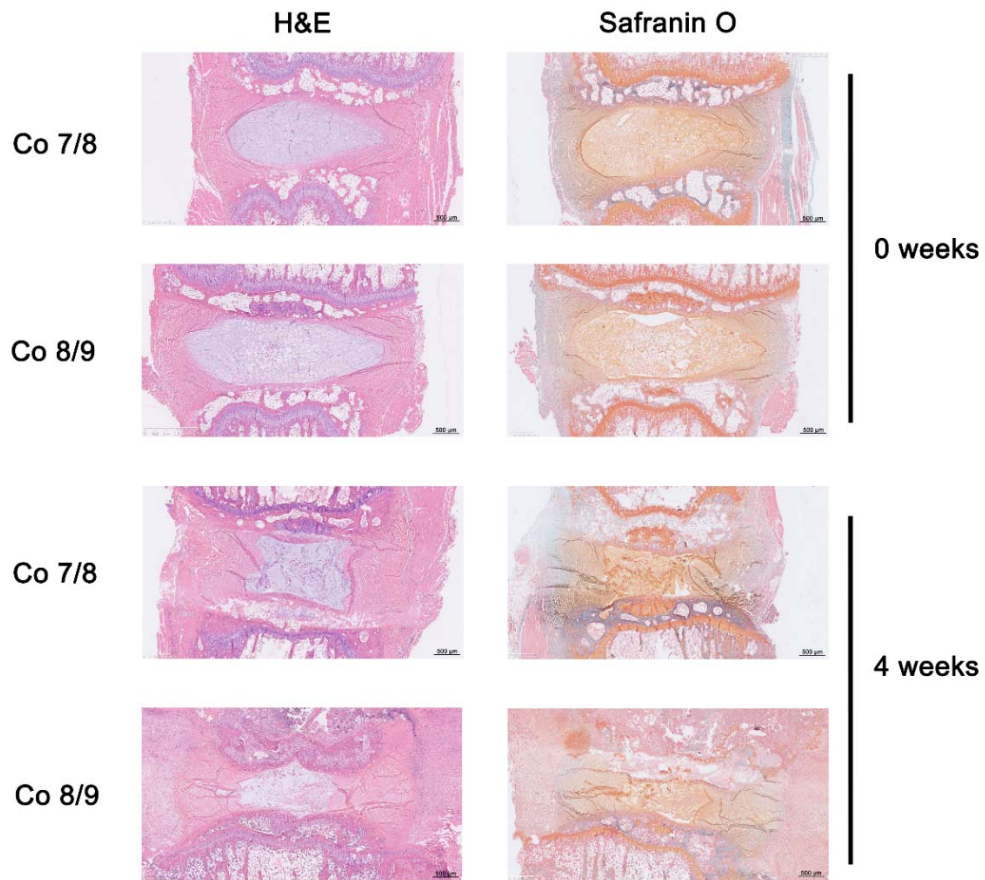

**Supplementary Figure 8.** The effects of LY294002 on cellular apoptosis in usage concentration (25  $\mu\text{M}$ ) were detected by western-blot analysis after 72h treatment without compression. Data are presented as mean  $\pm$  SD (n = 3). ns, no significance between two groups.

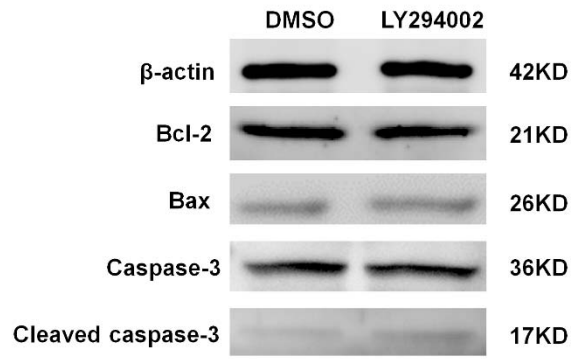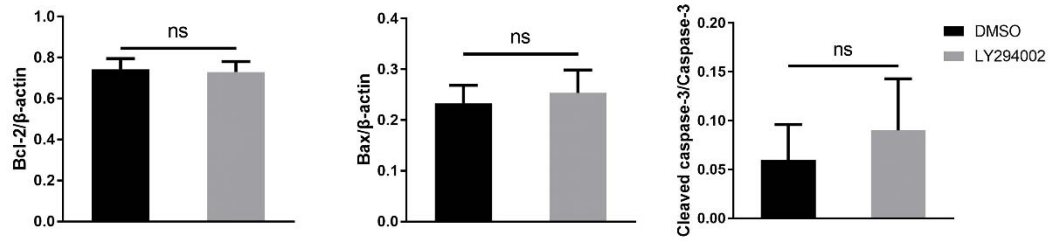

Supplement: f1 [file 7126914.f1.pdf]
